# Supplementary material
Source: PubMed Central journal article supplement (PMC2818815)
Supplement: NIHMS166931-supplement-Supp1.pdf [file NIHMS166931-supplement-Supp1.pdf]

## SUPPLEMENT MATERIAL

### Detailed Methods

**Echocardiography.** Mice were anesthetized with 5% isoflurane/O<sub>2</sub> and maintained on 2% mixture during the experiment. Non-invasive trans-thoracic echocardiography was performed using Vingmed Vivid Five (GE Technology) equipped with a 10-MHz linear transducer. The heart was imaged in 2-D mode in the parasternal short-axis view. The M-mode cursor was positioned perpendicular to the interventricular septum and posterior wall of the LV at the level of the papillary muscles and left ventricular parameters (chamber dimensions and wall thickness) were measured according to leading-edge convention adapted by the American Society of Echocardiography. The percentage of fractional shortening (FS%) and ejection fractions (EF%) were calculated according to following equations:  $FS = [(LVDd - LVDs) / LVDd] \times 100$ ;  $EF = [(EDVI - ESVI) / EDVI] \times 100$ , where LVDd/s represent left ventricular diameters in diastole/systole, ESVI the end-systolic left ventricular volume index and EDVI the end-diastolic left ventricular volume index.

**Gravimetric and histological analyses.** Hearts were dissected, weighed and either snap-frozen in dry ice-cold isopentane or fixed in 4% formaldehyde. For collagen deposition analysis, 5  $\mu$ m thick transverse cryo-sections were cut at intervals of 0.5 mm. Samples were fixed in ice-cold methanol for 10 min, rinsed with PBS and incubated for 2 min in Picrosirius Red solution (0.1% Sirius Red F3B in saturated aqueous solution of picric acid). Samples were subsequently washed in two changes of acidified water (0.5% glacial acetic acid/H<sub>2</sub>O), dehydrated in ethanol (3 changes) and, after clearing in xylene, mounted with Entellan<sup>®</sup> (Merck).

For immunofluorescence, cryosections were fixed in 3.7% formaldehyde/1% methanol (or ice-cold 100% methanol for LAP2 $\beta$  staining), washed in PBS and incubated for 30 min in blocking solution containing 20% normal goat serum/0.5% gelatine/0.5% TritonX-100/PBS. Primary antibodies [rabbit anti-LAP2 $\alpha$  affinity purified serum<sup>1</sup>, mouse anti-LAP2 $\beta$  mAb17<sup>2</sup>, goat anti-lamin A/C N-18 (Santa Cruz Biotechnology) and mouse anti-desmin RD301 (Abcam)] were diluted in PBS and applied overnight at 4°C. Sections were subsequently washed in PBS and incubated with respective fluorochrome-coupled secondary antibodies for 1 h at RT [anti-rabbit Texas Red and anti-mouse Cy5 (Jackson ImmunoResearch)]. After washing in PBS, nuclei were counterstained with Hoechst 33342 dye (1:5000 dilution in dH<sub>2</sub>O) for 10 min at RT and washed in dH<sub>2</sub>O. Samples were air-dried and mounted with Mowiol 4-88 (Roth).

Haematoxylin and eosin (H & E) staining was done according to the standard protocol. Fluorescence images were acquired at RT on Zeiss Axiovert 200M microscope, equipped with Zeiss LSM 510 META confocal laser-scanning unit, Plan-Neofluar 40 $\times$ /1.3 Oil DIC and Plan-Apochromat 63 $\times$ /1.4 oil DIC MC27 objectives, using Zeiss LSM imaging software. Data were processed with Zeiss LSM Image Browser and Adobe Photoshop CS2.

Brightfield images were acquired using Zeiss Axio Imager.M1 equipped with EC Plan-Neofluar M27 objectives (10 $\times$ /0.30, 20 $\times$ /0.50 and 40 $\times$ /1.30 Oil), Zeiss AxioCam MRc5 camera and AxioVision Rel. 4.6 software. Data were processed in Adobe Photoshop CS2 and figures were created in Adobe Illustrator CS2.

The extent of cardiac fibrosis was assessed on Picrosirius Red-stained samples by measuring the size of collagen-positive areas within the left ventricle (expressed in %), using Adobe Photoshop CS2 (10 sections/mouse prepared as mentioned above), and presented as fibrotic index.

**Western blot.** Frozen samples were homogenized in modified RIPA buffer [150 mM NaCl, 50 mM Tris-HCl pH 7.4, 1 mM EDTA, 1 mM PMSF, 1 × Protease Inhibitor Cocktail Complete® EDTA free (Roche)] using Precellys 24 homogenizer (PeqLab Biotechnology) and incubated for 2 hr at 4°C with 1% TritonX-100/0.1% SDS. Lysates were centrifuged at 15 000 *g* for 1 min, diluted in protein sample buffer and incubated for 5 min at 96°C. For  $\beta_2$ -AR expression analysis, heart membranes were prepared by tissue homogenization in lysis buffer (0.25 M sucrose, 30 mM histidine, 1 mM EDTA pH 8.0, 1 mM PMSF, 1 × Protease Inhibitor Cocktail) and 2 × 10 min centrifugation at 100 000 *g*. The pellets were resuspended in buffer containing 50 mM Tris-HCl [pH 7.4]/1 mM EDTA/1 mM PMSF/1 × Protease Inhibitor Cocktail/10% glycerol. Protein concentration was determined using Coomassie Plus™ Protein Assay (Pierce) and samples (20  $\mu$ g of protein) were loaded on 10% SDS-polyacrylamide gels without boiling. SDS-PAGE and immunoblotting were performed according to standard laboratory procedures. Samples were incubated overnight at 4°C with primary antibodies diluted in 2%BSA/PBST/0.02%NaN<sub>3</sub> [rabbit anti-LAP2 $\alpha$  serum 245-2, mouse anti-LAP2 mAb#12 recognizing the mouse LAP2 aa29-50 epitope (provided by C.A. Harris, R. W. Johnson Pharmaceutical Research Institute, Raritan, NJ), anti-lamin A/C N-18, anti- $\gamma$ - tubulin (Sigma), rabbit anti- $\beta_2$ -AR (M-20) SC-570 (Santa Cruz Biotechnology) and mouse anti-N-cadherin (BD Transduction Labs)]. Species-specific horseradish peroxidase-coupled secondary antibodies were applied for 1 hr at RT and SuperSignal® West Pico Chemiluminescent Substrate (Thermo Scientific) was used for signal detection on Clear Blue X-Ray films (Thermo Scientific). Films were scanned and processed by Adobe Photoshop CS2 and Adobe Illustrator CS2.

**Semi-quantitative and real-time PCR.** Total heart tissue RNA was isolated using TRIzol® reagent (Invitrogen) or RNeasy® Plus Micro Kit (Qiagen) and First Strand cDNA Synthesis Kit for RT-PCR (Roche) was used for cDNA synthesis according to manufacturer's instructions. cDNA was amplified using Go Taq Green Master Mix (Promega) in semiqPCR and MESA GREEN qPCR MasterMix Plus for SYBR® Assay I dTTP (Eurogentec), together with MasterCycler ep realplex (Eppendorf), in qPCR analyses. Images of ethidium bromide-stained agarose gels were documented using UVP Gel Doc-It TS Imaging System and processed with Adobe Photoshop CS2. qPCR data were normalized to endogenous HPRT levels and analyzed according to Pfaffl method<sup>3</sup>. The list of primers can be found in the Online Table V.

**Isoproterenol-induced heart failure model.** Acute cardiac stress was induced in mice by sustained infusion of  $\beta$ -adrenergic receptor agonist isoproterenol (Isoproterenol hydrochloride, Sigma Aldrich, I 6504) for 7 days. Mice were weighed and 15 mg/kg/day isoproterenol/0.5 mM ascorbic acid/PBS solution was prepared for each animal. Alzet® mini-osmotic pumps (model 1007D) were filled either with 100  $\mu$ l of isoproterenol (ISO) or 0.5 mM ascorbic acid/PBS (sham) solutions according to the manufacturer's instructions and kept in PBS for 3 hours before implantation. Mice were anesthetized with 5% isoflurane/O<sub>2</sub> mixture and placed on heated pads. During the procedure, anesthesia was maintained by administration of 2% isoflurane/O<sub>2</sub> mixture. The inter-scapular region of the back was shaved and disinfected with 70% ethanol and Wundesin® (10 mg/ml polyvidone-iodide aqueous solution). A small incision (~5 mm) was made in the skin between the scapulae and, by using a haemostat, a pocket was formed by spreading the subcutaneous connective tissue apart. The filled osmotic pump was inserted into the pocket, with the flow moderator pointing away from the incision, and the skin was closed with 2-3 silk (6/0) sutures. During the whole deep sleep and waking period mice were kept on heated pads with their vital functions carefully monitored. Echocardiography was performed 2 h before and 7 days after the pump implantation as described above.

## Online References

1. Vlcek S, Korbei B, Foisner R. Distinct functions of the unique C terminus of LAP2alpha in cell proliferation and nuclear assembly. *J Biol Chem*. 2002;277:18898-18907.
2. Gotzmann J, Vlcek S, Foisner R. Caspase-mediated cleavage of the chromosome-binding domain of lamina-associated polypeptide 2 alpha. *J Cell Sci*. 2000;113 Pt 21:3769-3780.
3. Pfaffl MW. A new mathematical model for relative quantification in real-time RT-PCR. *Nucleic Acids Res*. 2001;29:e45.
4. Naetar N, Korbei B, Kozlov S, Kerényi MA, Dorner D, Kral R, Gotic I, Fuchs P, Cohen TV, Bittner R, Stewart CL, Foisner R. Loss of nucleoplasmic LAP2alpha-lamin A complexes causes erythroid and epidermal progenitor hyperproliferation. *Nat Cell Biol*. 2008;10:1341-1348.
5. Dymecki SM. Flp recombinase promotes site-specific DNA recombination in embryonic stem cells and transgenic mice. *Proc Natl Acad Sci U S A*. 1996;93:6191-6196.
6. Bruning JC, Michael MD, Winnay JN, Hayashi T, Horsch D, Accili D, Goodyear LJ, Kahn CR. A muscle-specific insulin receptor knockout exhibits features of the metabolic syndrome of NIDDM without altering glucose tolerance. *Mol Cell*. 1998;2:559-569.
7. Boivin B, Lavoie C, Vaniotis G, Baragli A, Villeneuve LR, Ethier N, Trieu P, Allen BG, Hebert TE. Functional beta-adrenergic receptor signalling on nuclear membranes in adult rat and mouse ventricular cardiomyocytes. *Cardiovasc Res*. 2006;71:69-78.
8. Oudit GY, Crackower MA, Eriksson U, Sarao R, Kozieradzki I, Sasaki T, Irie-Sasaki J, Gidrewicz D, Rybin VO, Wada T, Steinberg SF, Backx PH, Penninger JM. Phosphoinositide 3-kinase gamma-deficient mice are protected from isoproterenol-induced heart failure. *Circulation*. 2003;108:2147-2152.
9. Rybin VO, Xu X, Lisanti MP, Steinberg SF. Differential targeting of beta -adrenergic receptor subtypes and adenylyl cyclase to cardiomyocyte caveolae. A mechanism to functionally regulate the cAMP signaling pathway. *J Biol Chem*. 2000;275:41447-41457.
10. Zhu WZ, Chakir K, Zhang S, Yang D, Lavoie C, Bouvier M, Hebert TE, Lakatta EG, Cheng H, Xiao RP. Heterodimerization of beta1- and beta2-adrenergic receptor subtypes optimizes beta-adrenergic modulation of cardiac contractility. *Circ Res*. 2005;97:244-251.
11. Parker GE, Pederson BA, Obayashi M, Schroeder JM, Harris RA, Roach PJ. Gene expression profiling of mice with genetically modified muscle glycogen content. *Biochem J*. 2006;395:137-145.
12. Lou DY, Dominguez I, Toselli P, Landesman-Bollag E, O'Brien C, Seldin DC. The alpha catalytic subunit of protein kinase CK2 is required for mouse embryonic development. *Mol Cell Biol*. 2008;28:131-139.
13. Ellmers LJ, Knowles JW, Kim HS, Smithies O, Maeda N, Cameron VA. Ventricular expression of natriuretic peptides in Npr1(-/-) mice with cardiac hypertrophy and fibrosis. *Am J Physiol Heart Circ Physiol*. 2002;283:H707-714.
14. Mo L, Cheng J, Lee EY, Sun TT, Wu XR. Gene deletion in urothelium by specific expression of Cre recombinase. *Am J Physiol Renal Physiol*. 2005;289:F562-568.
15. Bisping E, Ikeda S, Kong SW, Tarnavski O, Bodyak N, McMullen JR, Rajagopal S, Son JK, Ma Q, Springer Z, Kang PM, Izumo S, Pu WT. Gata4 is required for maintenance of postnatal cardiac function and protection from pressure overload-induced heart failure. *Proc Natl Acad Sci U S A*. 2006;103:14471-14476.
16. Vlcek S, Foisner R, Wilson KL. Lco1 is a novel widely expressed lamin-binding protein in the nuclear interior. *Exp Cell Res*. 2004;298:499-511.
17. Xu C, Liguori G, Adamson ED, Persico MG. Specific arrest of cardiogenesis in cultured embryonic stem cells lacking Cripto-1. *Dev Biol*. 1998;196:237-247.

18. Kerenyi MA, Grebien F, Gehart H, Schifrer M, Artaker M, Kovacic B, Beug H, Moriggl R, Mullner EW. Stat5 regulates cellular iron uptake of erythroid cells via IRP-2 and TfR-1. *Blood*. 2008;112:3878-3888.
19. Naetar N KB, Kozlov S, Kerenyi MA, Dorner D, Kral I, Gotic I, Fuchs P, Cohen T, Bittner R, Stewart CL, Foisner R. Loss of nucleoplasmic LAP2alpha-lamin A complexes causes erythroid and epidermal progenitor hyperproliferation. *Nature Cell Biology*. 2008.
20. Azmi S, Ozog A, Taneja R. Sharp-1/DEC2 inhibits skeletal muscle differentiation through repression of myogenic transcription factors. *J Biol Chem*. 2004;279:52643-52652.
21. Porter JD, Merriam AP, Gong B, Kasturi S, Zhou X, Hauser KF, Andrade FH, Cheng G. Postnatal suppression of myomesin, muscle creatine kinase and the M-line in rat extraocular muscle. *J Exp Biol*. 2003;206:3101-3112.
22. Ueyama T, Kasahara H, Ishiwata T, Nie Q, Izumo S. Myocardin expression is regulated by Nkx2.5, and its function is required for cardiomyogenesis. *Mol Cell Biol*. 2003;23:9222-9232.

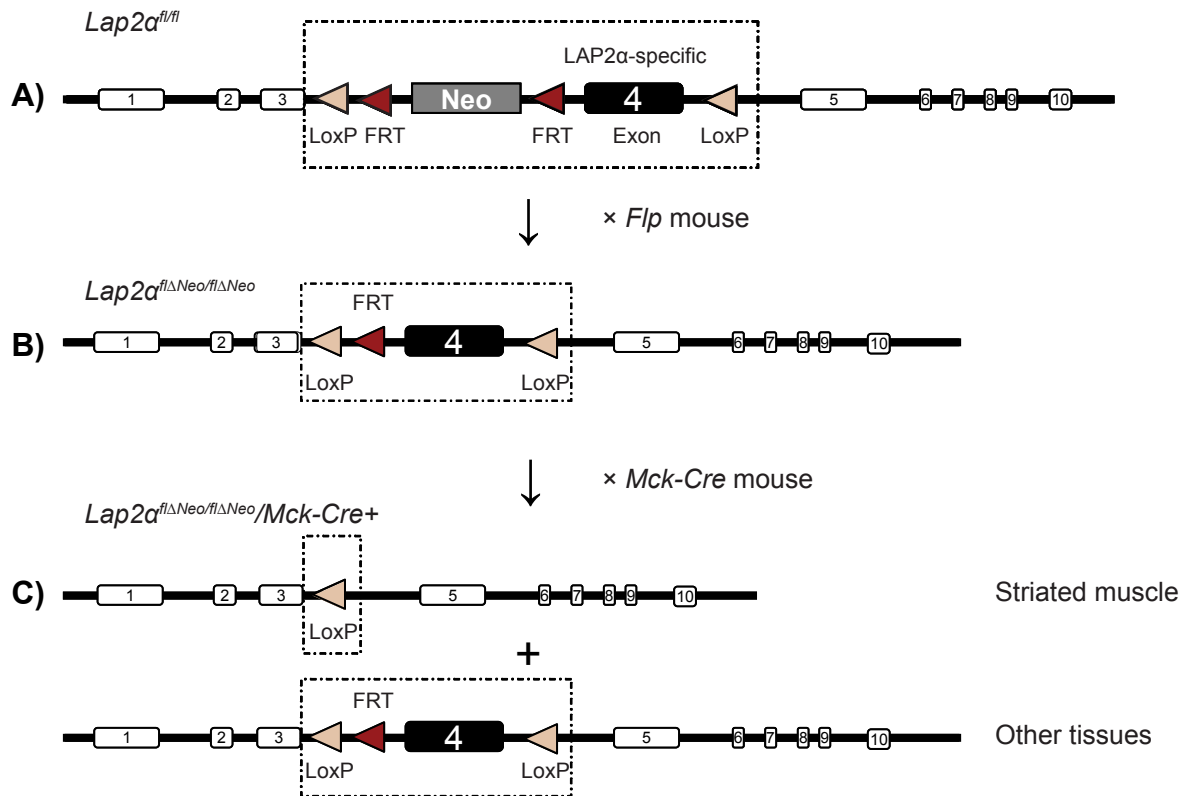

**Online Figure I. Generation of  $Lap2\alpha^{fl\Delta Neo/fl\Delta Neo}/Mck-Cre^+$  mice. A)** Crossing  $Lap2\alpha^{fl/fl}$  mice<sup>4</sup> to *Flp*-deleter mice<sup>5</sup> resulted in the removal of the Neomycin resistance cassette from the transgenic *Lap2* locus in all tissues. **B)** The newly generated  $Lap2\alpha^{fl\Delta Neo/fl\Delta Neo}$  strain was interbred to the *Mck-Cre* transgenic line<sup>6</sup> to create striated muscle-specific  $Lap2\alpha^{-/-}$  mice lacking the  $\alpha$ -specific exon 4 of the *Lap2* gene only in tissues expressing MCK ( $Lap2\alpha^{fl\Delta Neo/fl\Delta Neo}/Mck-Cre^+$ ) (C).

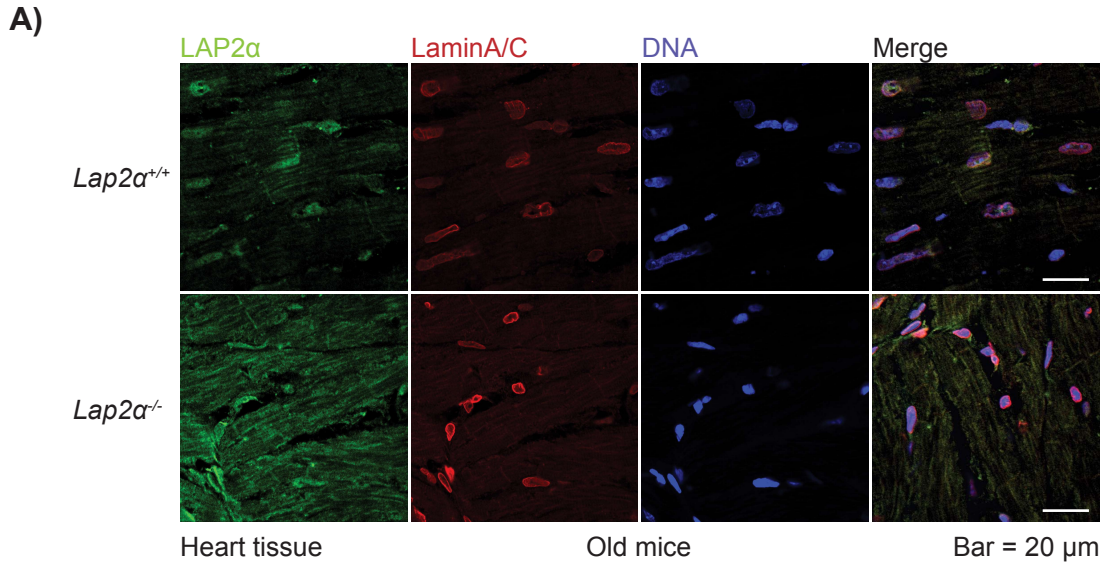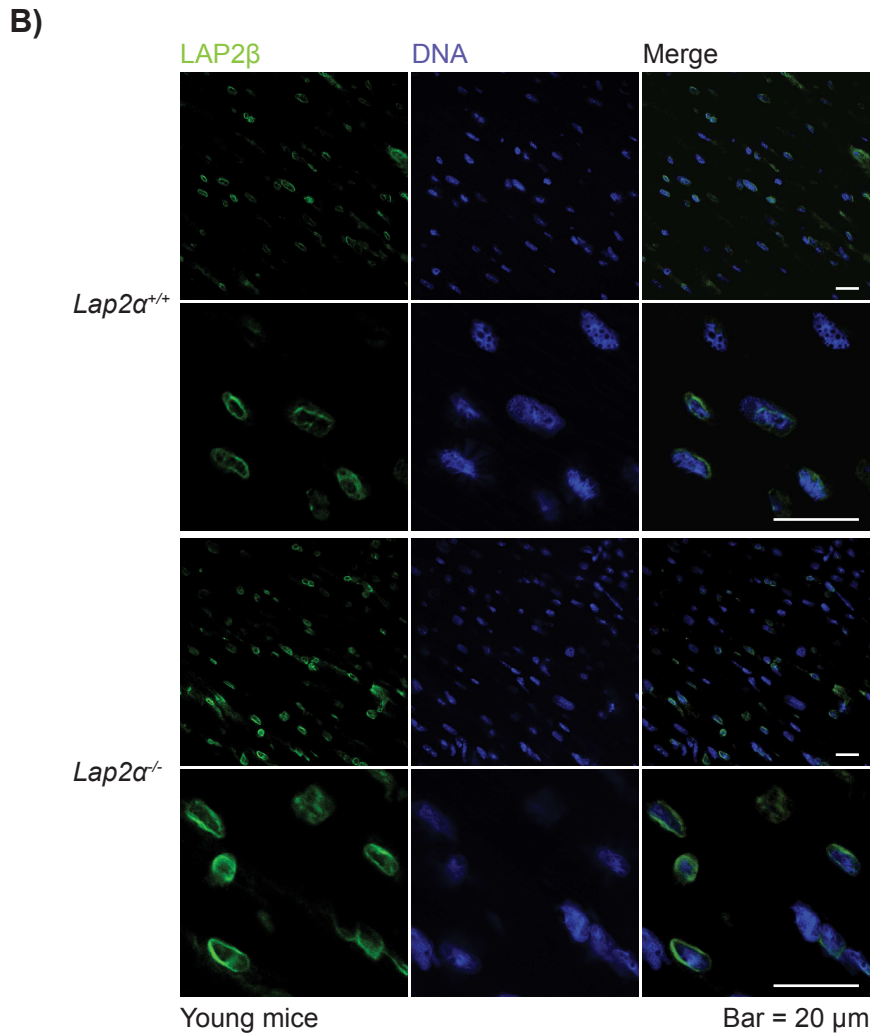

**Online Figure II. Localization of lamin A/C (A) and LAP2 $\beta$  (B) in *Lap2 $\alpha$ <sup>-/-</sup> heart tissue appears normal.*** (Immunofluorescence analysis of heart tissue at 12 and 2 months of age respectively; n = 1 female + 3 male mice).

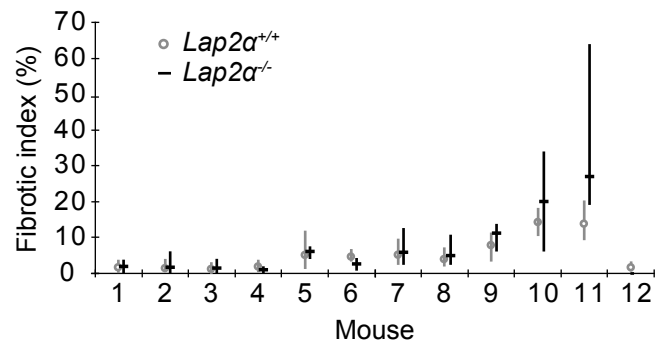

**Online Figure III. Male *Lap2α*<sup>-/-</sup> mice show only sporadic cases of cardiac fibrosis.** (Fibrotic index = % of right ventricular myocardium positive for collagen on Picrosirius Red-stained sections. Max, min and average values for each mouse are shown).

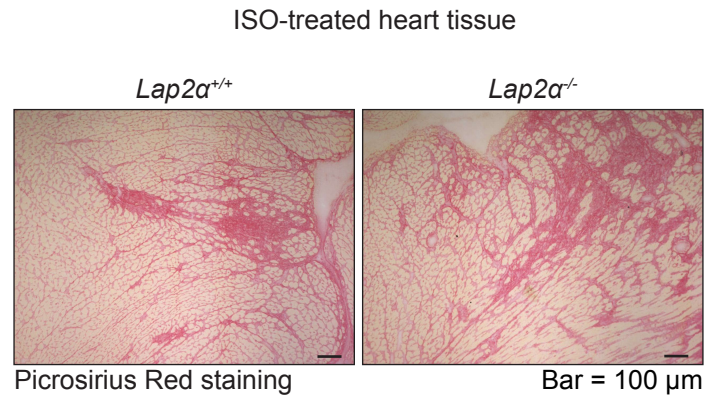

**Online Figure IV. ISO-treatment causes subendocardial fibrosis in both *Lap2 $\alpha$ <sup>-/-</sup>* and WT mice. (Picosirius Red-stained heart sections).**



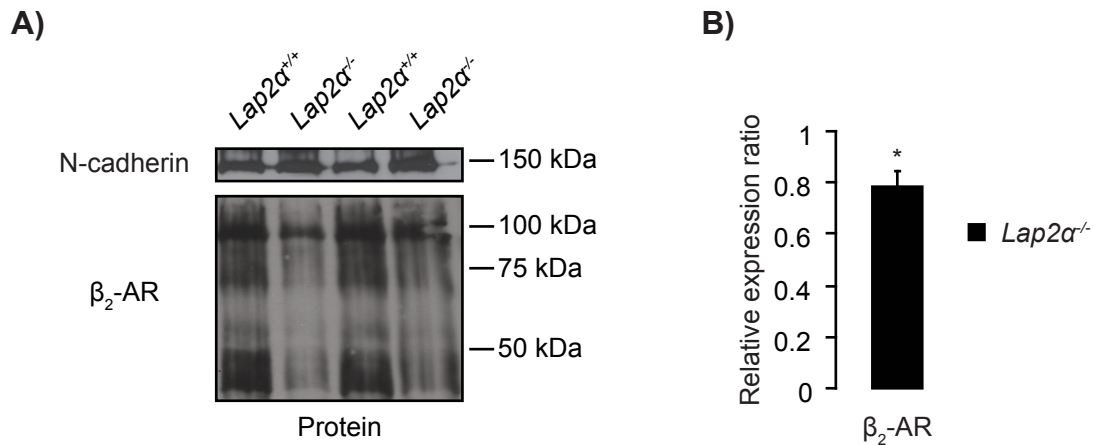

**Online Figure V. The expression of  $\beta_2$ -AR protein is reduced in *Lap2 $\alpha$ <sup>-/-</sup>* hearts. **A)** Western blot analysis of heart membrane extracts. Representative image of 4 separate experiments is shown. Each lane was loaded with 20  $\mu$ g of protein. Samples were normalized to endogenous N-cadherin content. High level of glycosylation and heterodimerization results in a variety of molecular weight species recognized by particular antibodies<sup>7-10</sup> (predicted molecular weight of mouse  $\beta_2$ -AR is 46 kDa (NP\_031446.2)). **B)** Quantitative analysis of the relative  $\beta_2$ -AR expression in *Lap2 $\alpha$ <sup>-/-</sup>* hearts. (The relative KO/WT  $\beta_2$ -AR expression ratio is shown. n = 4 old male littermate pairs, \*p<0.05, ANOVA, mean  $\pm$  SE).**

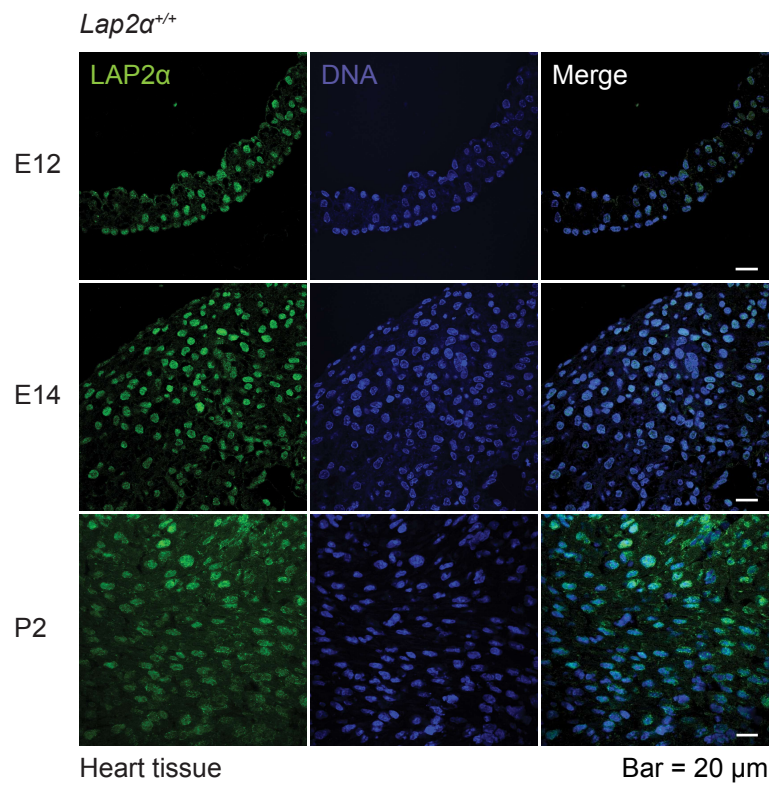

**Online Figure VI. LAP2 $\alpha$  is highly expressed in developing cardiac tissue.** Immunofluorescence analysis of heart tissue sections at embryonic day 12 and 14 (E12 and E14) and postnatal day 2 (P2).

**Online Table I.** Echocardiography reveals impaired heart function in male *Lap2 $\alpha$ <sup>-/-</sup>* mice.

| Young mice (10 weeks)   |                                                |                                                |                                                |                                                |
|-------------------------|------------------------------------------------|------------------------------------------------|------------------------------------------------|------------------------------------------------|
|                         | <i>Lap2<math>\alpha</math><sup>+/+</sup></i> M | <i>Lap2<math>\alpha</math><sup>-/-</sup></i> M | <i>Lap2<math>\alpha</math><sup>+/+</sup></i> F | <i>Lap2<math>\alpha</math><sup>-/-</sup></i> F |
| n                       | 8                                              | 8                                              | 4                                              | 4                                              |
| Heart rate/ bpm         | 410.63 ± 15.76                                 | 410.25 ± 21.72                                 | 380.00 ± 17.80                                 | 387.50 ± 12.50                                 |
| FS %                    | <b>36.72</b> ± 1.23                            | <b>27.97</b> ± 1.38*                           | <b>37.22</b> ± 0.81                            | <b>36.49</b> ± 1.44                            |
| LVDd/cm                 | 0.36 ± 0.01                                    | 0.35 ± 0.03                                    | 0.34 ± 0.02                                    | 0.33 ± 0.01                                    |
| LVDs/cm                 | 0.23 ± 0.01                                    | 0.25 ± 0.02                                    | 0.22 ± 0.01                                    | 0.21 ± 0.01                                    |
| LVPWd/mm                | 0.85 ± 0.06                                    | 0.82 ± 0.10                                    | 0.74 ± 0.07                                    | 0.72 ± 0.03                                    |
| LVPWs/mm                | 1.43 ± 0.08                                    | 1.23 ± 0.07                                    | 1.26 ± 0.09                                    | 1.16 ± 0.05                                    |
| IVSd/mm                 | 0.91 ± 0.04                                    | 0.81 ± 0.04                                    | 0.79 ± 0.06                                    | 0.73 ± 0.02                                    |
| IVSs/mm                 | 1.26 ± 0.07                                    | 1.17 ± 0.09                                    | 1.11 ± 0.11                                    | 0.96 ± 0.06                                    |
| LA/mm                   | 2.14 ± 0.15                                    | 2.82 ± 0.21*                                   | 2.70 ± 0.34                                    | 2.56 ± 0.07                                    |
| ESVI ml/m2              | 0.04 ± 0.00                                    | 0.05 ± 0.01                                    | 0.03 ± 0.01                                    | 0.03 ± 0.01                                    |
| EDVI ml/m2              | 0.14 ± 0.01                                    | 0.14 ± 0.03                                    | 0.14 ± 0.02                                    | 0.12 ± 0.01                                    |
| EF %                    | 73.18 ± 0.02                                   | 61.00 ± 0.02*                                  | 74.01 ± 0.96                                   | 73.08 ± 1.72                                   |
|                         |                                                |                                                |                                                |                                                |
| Old mice (10-12 months) |                                                |                                                |                                                |                                                |
|                         | <i>Lap2<math>\alpha</math><sup>+/+</sup></i> M | <i>Lap2<math>\alpha</math><sup>-/-</sup></i> M | <i>Lap2<math>\alpha</math><sup>+/+</sup></i> F | <i>Lap2<math>\alpha</math><sup>-/-</sup></i> F |
| n                       | 11                                             | 13                                             | 4                                              | 5                                              |
| Heart rate/ bpm         | 418.91 ± 15.80                                 | 428.31 ± 10.31                                 | 430.00 ± 14.63                                 | 408.00 ± 35.28                                 |
| FS %                    | <b>36.88</b> ± 0.86                            | <b>30.39</b> ± 1.67*                           | <b>33.00</b> ± 3.41                            | <b>37.83</b> ± 3.94                            |
| LVDd/cm                 | 0.36 ± 0.02                                    | 0.38 ± 0.01                                    | 0.36 ± 0.01                                    | 0.39 ± 0.03                                    |
| LVDs/cm                 | 0.23 ± 0.01                                    | 0.26 ± 0.01                                    | 0.23 ± 0.02                                    | 0.24 ± 0.03                                    |
| LVPWd/mm                | 0.91 ± 0.05                                    | 0.92 ± 0.06                                    | 0.71 ± 0.03                                    | 0.77 ± 0.04                                    |
| LVPWs/mm                | 1.48 ± 0.07                                    | 1.41 ± 0.07                                    | 1.33 ± 0.11                                    | 1.23 ± 0.17                                    |
| IVSd/mm                 | 0.91 ± 0.03                                    | 0.92 ± 0.04                                    | 0.84 ± 0.02                                    | 0.75 ± 0.07*                                   |
| IVSs/mm                 | 1.30 ± 0.07                                    | 1.28 ± 0.07                                    | 1.16 ± 0.06                                    | 1.01 ± 0.07                                    |
| LA/mm                   | 2.37 ± 0.16                                    | 2.75 ± 0.23                                    | 2.40 ± 0.29                                    | 2.13 ± 0.22                                    |
| ESVI ml/m2              | 0.04 ± 0.01                                    | 0.05 ± 0.01                                    | 0.03 ± 0.00                                    | 0.04 ± 0.01                                    |
| EDVI ml/m2              | 0.13 ± 0.01                                    | 0.13 ± 0.02                                    | 0.13 ± 0.01                                    | 0.16 ± 0.00                                    |
| EF %                    | 73.43 ± 0.01                                   | 64.65 ± 0.03*                                  | 73.66 ± 2.06                                   | 73.78 ± 4.45                                   |

†Raw data were tested for outliers according to Grubb's test and from the initial group of 12 old WT animals one mouse was excluded from further analyses.

\*p<0.05 ANOVA, values are means ± SE. M – male; F – female; n – number of mice; bpm – beats per minute; FS% – fractional shortening; LVDd/s – left ventricular diameter in diastole/systole; LVPWd/s left ventricular posterior wall thickness in diastole/systole; IVSd/s – interventricular septum thickness in diastole/systole, LA – left atrium diameter; ESVI – end-systolic left ventricular volume index; EDVI – end-diastolic left ventricular volume index; EF% – ejection fraction.

**Online Table II.** *Lap2α*<sup>-/-</sup> mice show a blunted response to chronic isoproterenol infusion. Echocardiography parameters recorded before and 7 days after ISO-infusion.

| Isoproterenol               |                               |                               |                               |                               |
|-----------------------------|-------------------------------|-------------------------------|-------------------------------|-------------------------------|
|                             | <i>Lap2α</i> <sup>+/+</sup> M | <i>Lap2α</i> <sup>-/-</sup> M | <i>Lap2α</i> <sup>+/+</sup> M | <i>Lap2α</i> <sup>-/-</sup> M |
| <b>Old mice (10 months)</b> | <b>Before</b>                 |                               | <b>Isoproterenol</b>          |                               |
| <b>n</b>                    | 6                             | 7                             | 6                             | 7                             |
| <b>Heart rate/ bpm</b>      | 489.50 ± 26.27                | 452.57 ± 10.16                | 507.17 ± 36.33                | 532.29 ± 14.55 <sup>‡</sup>   |
| <b>FS %</b>                 | <b>33.44</b> ± 2.37           | <b>29.77</b> ± 1.61           | <b>29.63</b> ± 3.70           | <b>25.84</b> ± 2.94           |
| <b>LVDd/cm</b>              | 0.30 ± 0.01                   | 0.35 ± 0.02                   | 0.41 ± 0.01 <sup>‡</sup>      | 0.41 ± 0.02 <sup>§</sup>      |
| <b>LVDs/cm</b>              | 0.20 ± 0.01                   | 0.24 ± 0.01                   | 0.29 ± 0.02 <sup>‡</sup>      | 0.31 ± 0.02                   |
| <b>LVPWd/mm</b>             | 1.14 ± 0.09                   | 1.05 ± 0.06                   | 1.00 ± 0.05                   | 1.06 ± 0.10                   |
| <b>LVPWs/mm</b>             | 1.60 ± 0.08                   | 1.51 ± 0.03                   | 1.42 ± 0.10                   | 1.41 ± 0.09                   |
| <b>IVSd/mm</b>              | 1.07 ± 0.04                   | 0.96 ± 0.05                   | 0.89 ± 0.07                   | 1.02 ± 0.10                   |
| <b>IVSs/mm</b>              | 1.50 ± 0.07                   | 1.40 ± 0.04                   | 1.31 ± 0.08                   | 1.45 ± 0.11                   |
| <b>LA/mm</b>                | 3.02 ± 0.31                   | 3.05 ± 0.38                   | 3.44 ± 0.31                   | 3.81 ± 0.39                   |
| <b>ESVI ml/m2</b>           | 0.02 ± 0.00                   | 0.04 ± 0.01                   | 0.06 ± 0.01 <sup>‡</sup>      | 0.07 ± 0.01                   |
| <b>EDVI ml/m2</b>           | 0.07 ± 0.01                   | 0.10 ± 0.01                   | 0.15 ± 0.01 <sup>‡</sup>      | 0.16 ± 0.02                   |
| <b>EF %</b>                 | 68.82 ± 3.28                  | 63.69 ± 2.43                  | 62.21 ± 6.00                  | 56.52 ± 5.00                  |
| <b>Sham (PBS)</b>           |                               |                               |                               |                               |
|                             | <i>Lap2α</i> <sup>+/+</sup> M | <i>Lap2α</i> <sup>-/-</sup> M | <i>Lap2α</i> <sup>+/+</sup> M | <i>Lap2α</i> <sup>-/-</sup> M |
| <b>Old mice (10 months)</b> | <b>Before</b>                 |                               | <b>PBS</b>                    |                               |
| <b>n</b>                    | 2                             | 2                             | 2                             | 2                             |
| <b>Heart rate/ bpm</b>      | 465.00 ± 55.00                | 500.00 ± 40.00                | 445.00 ± 15.00                | 477.50 ± 37.50                |
| <b>FS %</b>                 | <b>34.64</b> ± 4.49           | <b>34.07</b> ± 0.29           | <b>33.44</b> ± 3.01           | <b>32.70</b> ± 1.93           |
| <b>LVDd/cm</b>              | 0.31 ± 0.01                   | 0.31 ± 0.02                   | 0.30 ± 0.00                   | 0.34 ± 0.00                   |
| <b>LVDs/cm</b>              | 0.20 ± 0.02                   | 0.21 ± 0.01                   | 0.20 ± 0.01                   | 0.23 ± 0.01                   |
| <b>LVPWd/mm</b>             | 0.97 ± 0.00                   | 1.07 ± 0.09                   | 1.06 ± 0.09                   | 1.14 ± 0.17                   |
| <b>LVPWs/mm</b>             | 1.17 ± 0.20                   | 1.37 ± 0.04                   | 1.38 ± 0.05                   | 1.43 ± 0.13                   |
| <b>IVSd/mm</b>              | 1.01 ± 0.30                   | 1.17 ± 0.01                   | 1.05 ± 0.05                   | 1.11 ± 0.07                   |
| <b>IVSs/mm</b>              | 1.33 ± 0.23                   | 1.72 ± 0.03                   | 1.42 ± 0.07                   | 1.72 ± 0.16                   |
| <b>LA/mm</b>                | 2.40 ± 0.00                   | 1.87 ± 0.40                   | 2.35 ± 0.35                   | 2.15 ± 0.20                   |
| <b>ESVI ml/m2</b>           | 0.02 ± 0.01                   | 0.02 ± 0.00                   | 0.02 ± 0.00                   | 0.03 ± 0.00                   |
| <b>EDVI ml/m2</b>           | 0.06 ± 0.01                   | 0.06 ± 0.01                   | 0.06 ± 0.00                   | 0.08 ± 0.00                   |
| <b>EF %</b>                 | 70.54 ± 5.89                  | 70.17 ± 0.33                  | 69.21 ± 4.05                  | 68.15 ± 2.65                  |

Data were analysed using Student's paired t-test (comparisons within one genotype before and after the treatment) and ANOVA (comparisons between the two genotypes and multiple comparisons), followed by Boniferroni adjustment where applicable. §p=0.05; ‡p<0.05 Student's paired t-test; mean values ± SE are shown.

**Online Table III.** Echocardiography parameters – *Lap2 $\alpha$ <sup>-/-</sup>/Mdx* mice.

|                 | <i>Lap2<math>\alpha</math><sup>+/+</sup>/Mdx</i> | <i>Lap2<math>\alpha</math><sup>-/-</sup>/Mdx</i> | <i>Lap2<math>\alpha</math><sup>+/+</sup>/Mdx</i> | <i>Lap2<math>\alpha</math><sup>-/-</sup>/Mdx</i> |
|-----------------|--------------------------------------------------|--------------------------------------------------|--------------------------------------------------|--------------------------------------------------|
|                 | Young (10 weeks)                                 |                                                  | Old (10-12 months)                               |                                                  |
| n               | 3                                                | 3                                                | 4                                                | 5                                                |
| Heart rate/ bpm | 400.00 ± 0.00                                    | 413.33 ± 17.64                                   | 442.50 ± 63.03                                   | 404.00 ± 26.94                                   |
| FS %            | <b>39.51</b> ± 0.43*                             | <b>39.58</b> ± 1.46*                             | <b>31.22</b> ± 2.74†                             | <b>28.24</b> ± 2.21†                             |
| LVDd/cm         | 0.37 ± 0.03                                      | 0.38 ± 0.02                                      | 0.42 ± 0.01                                      | 0.41 ± 0.01                                      |
| LVDs/cm         | 0.22 ± 0.01                                      | 0.23 ± 0.02                                      | 0.29 ± 0.02                                      | 0.30 ± 0.01                                      |
| LVPWd/mm        | 0.58 ± 0.08                                      | 0.70 ± 0.11                                      | 0.73 ± 0.07                                      | 0.70 ± 0.04                                      |
| LVPWs/mm        | 1.15 ± 0.09                                      | 1.28 ± 0.11                                      | 1.17 ± 0.07                                      | 1.03 ± 0.10                                      |
| IVSd/mm         | 0.75 ± 0.04                                      | 0.71 ± 0.02                                      | 0.91 ± 0.10                                      | 0.87 ± 0.07                                      |
| IVSs/mm         | 1.10 ± 0.13                                      | 1.10 ± 0.09                                      | 1.11 ± 0.11                                      | 1.08 ± 0.06                                      |
| LA/mm           | 2.16 ± 0.16                                      | 2.50 ± 0.07                                      | 3.43 ± 0.14                                      | 3.27 ± 0.18                                      |
| ESVI ml/m2      | 0.03 ± 0.01                                      | 0.03 ± 0.01                                      | 0.06 ± 0.01                                      | 0.06 ± 0.01                                      |
| EDVI ml/m2      | 0.14 ± 0.03                                      | 0.15 ± 0.02                                      | 0.16 ± 0.01                                      | 0.15 ± 0.01                                      |
| EF %            | 76.63 ± 0.43                                     | 76.62 ± 1.70                                     | 65.45 ± 3.97                                     | 61.05 ± 3.64                                     |

\*p<0.05, ANOVA, *Lap2 $\alpha$ <sup>-/-</sup>* vs. *Lap2 $\alpha$ <sup>+/+</sup>/Mdx* and *Lap2 $\alpha$ <sup>-/-</sup>/Mdx* young mice.

†p<0.05, ANOVA, *Lap2 $\alpha$ <sup>+/+</sup>* vs. *Lap2 $\alpha$ <sup>+/+</sup>/Mdx* and *Lap2 $\alpha$ <sup>-/-</sup>/Mdx* old mice.

**Online Table IV.** Echocardiography parameters – *Lap2 $\alpha$ <sup>fl $\Delta$ Neo/fl $\Delta$ Neo</sup>/Mck-Cre<sup>+</sup>* mice.

|                         | <i>Lap2<math>\alpha</math><sup>+/+</sup>/Mck-Cre<sup>+</sup></i> | <i>Lap2<math>\alpha</math><sup>fl<math>\Delta</math>Neo/fl<math>\Delta</math>Neo</sup>/Mck-Cre<sup>+</sup></i> |
|-------------------------|------------------------------------------------------------------|----------------------------------------------------------------------------------------------------------------|
| <b>Young (10 weeks)</b> |                                                                  |                                                                                                                |
| n                       | 5                                                                | 5                                                                                                              |
| Heart rate/ bpm         | 360.00 $\pm$ 7.07                                                | 378.00 $\pm$ 18.81                                                                                             |
| FS %                    | <b>32.54</b> $\pm$ 1.01                                          | <b>33.88</b> $\pm$ 1.42                                                                                        |
| LVDd/cm                 | 0.39 $\pm$ 0.01                                                  | 0.38 $\pm$ 0.01                                                                                                |
| LVDs/cm                 | 0.26 $\pm$ 0.01                                                  | 0.25 $\pm$ 0.01                                                                                                |
| LVPWd/mm                | 0.72 $\pm$ 0.05                                                  | 0.72 $\pm$ 0.02                                                                                                |
| LVPWs/mm                | 1.22 $\pm$ 0.08                                                  | 1.28 $\pm$ 0.07                                                                                                |
| IVSd/mm                 | 0.79 $\pm$ 0.02                                                  | 0.84 $\pm$ 0.05                                                                                                |
| IVSs/mm                 | 1.05 $\pm$ 0.09                                                  | 1.06 $\pm$ 0.07                                                                                                |
| LA/mm                   | 2.38 $\pm$ 0.13                                                  | 2.35 $\pm$ 0.19                                                                                                |
| ESVI ml/m <sup>2</sup>  | 0.05 $\pm$ 0.00                                                  | 0.04 $\pm$ 0.01                                                                                                |
| EDVI ml/m <sup>2</sup>  | 0.14 $\pm$ 0.01                                                  | 0.13 $\pm$ 0.01                                                                                                |
| EF %                    | 67.78 $\pm$ 1.38                                                 | 69.55 $\pm$ 1.97                                                                                               |

**Online Table V.** Primer sequences used for quantitative and semi-quantitative PCR.

| Name/Target        | Sequence                   | T <sub>m</sub><br>°C | Source      |
|--------------------|----------------------------|----------------------|-------------|
| Adrb2_forward      | TCTGTGCCTTCGCAGGTCTT       | 59.4                 | 11          |
| Adrb2_reverse      | GTCCGTTCTGCCGTTGCTA        | 58.8                 |             |
| ANF_forward        | CGGTGTCCAACACAGATCTG       | 59.4                 | 12          |
| ANF_reverse        | TCTCTCGAGGTGGGTTGAC        | 58.8                 |             |
| mBNP_forward       | CTGCTGGAGCTGATAAGAGA       | 57.3                 | 13          |
| mBNP_reverse       | TGCCCAAAGCAGCTTGAGAT       | 57.3                 |             |
| Cre2_forward       | CGAACGCACTGATTTCTGA        | 56.7                 | 14          |
| Cre2_reverse       | GGCAACACCATTTTTTCTGAC      | 55.9                 |             |
| Ctgf_forward       | TGTGTGACGAGCCCAAGGA        | 58.8                 | 15          |
| Ctgf_reverse       | TTGGGTCTGGGCCAAATGT        | 56.7                 |             |
| GAPDH-hm1          | CATCACCATCTTCCAGGAGCGA     | 62.1                 | 16          |
| GAPDH-hm2          | CCTGCTTCACCACCTTCTTGAT     | 60.3                 |             |
| GATA4b_forward     | CACTATGGGCACAGCAGCTCC      | 63.7                 | 17          |
| GATA4b_reverse     | TTGGAGCTGGCCTGCGATGTC      | 63.7                 |             |
| Hprt_forward       | TGATTAGCGATGATGAACCAGG     | 58.4                 | 18          |
| Hprt_reverse       | CTTTCATGACATCTCGAGCAAG     | 60.3                 |             |
| LAP2com_hm1        | GTGGGAACAACCAGGAAGCTATATGA | 63.2                 | 19          |
| LAP2ar_hm1         | AGAGTGCTAAGTCCAAGTCTGAT    | 61.0                 |             |
| LAP2br_hm1         | CTCCCACTTCAGCTCTTGTCAATG   | 62.7                 |             |
| mLamAC1091f        | CATCAAGCTGGCCCTGGACATGGA   | 67.9                 | 19          |
| mLamAC1549r        | TGCGCCTTCCACACCAAGTCAGTA   | 66.3                 |             |
| MEF2C-RT2-1        | GTATGTCTCCTGGTGTAAACA      | 55.3                 | 20          |
| MEF2C-RT2-2        | GGATATCCTCCCATTCTTG        | 57.3                 |             |
| MCK_forward        | GAGATCTTCAAGAAGGCTGGTCA    | 60.6                 | 21          |
| MCK_reverse        | GAGATGTCTGAACACGGCG        | 58.2                 |             |
| MyocardinA_forward | TCACTGTGTGGAGTCCTCAGGTC    | 64.2                 | 22          |
| MyocardinA_reverse | TGGCATCGGCTGGCATT          | 58.8                 |             |
| STARS_forward      | GGCTCCTGCCAGGATCAAAC       | 61.4                 | NM 175456.4 |
| STARS_reverse      | TAGCCCTCGTCTCCCTTGTG       | 61.4                 |             |
| TGFβ_forward       | AGCGCTACATCGATAGCAAG       | 57.3                 | 15          |
| TGFβ_reverse       | TCCTGTCTTTGTGGTGAAGC       | 57.3                 |             |
